# Supplementary material
Source: PubMed Central journal article supplement (PMC4243983)
Supplement: bph0171-4112-sd1.pdf [file bph0171-4112-sd1.pdf]

### Pathway Selective Antagonism Of Proteinase Activated Receptor 2

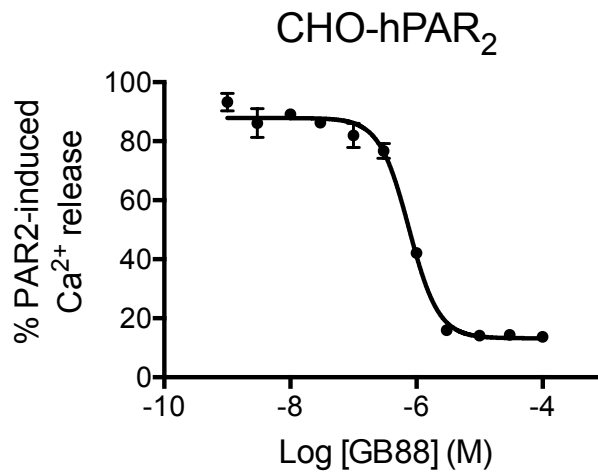

Figure S1. GB88 blocked 2f-LIGRLO-NH<sub>2</sub>-induced intracellular calcium release in CHO-hPAR<sub>2</sub>. Cells were incubated with various concentrations of GB88 for 15 min, then treated with 2f-LIGRLO-NH<sub>2</sub> (1  $\mu$ M) and monitored for intracellular calcium release.

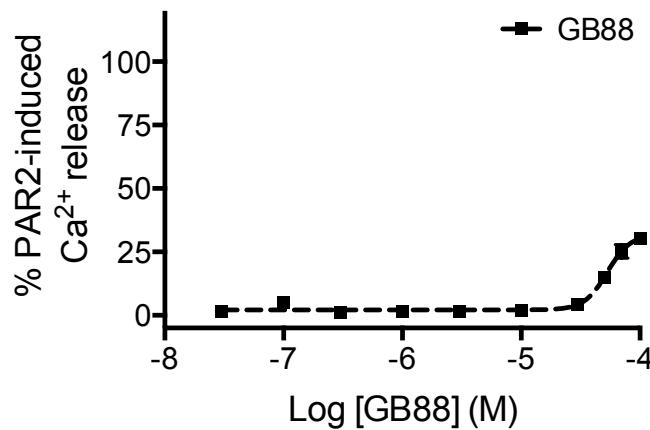

Figure S2. GB88 induced intracellular calcium release at high concentration in HT29.

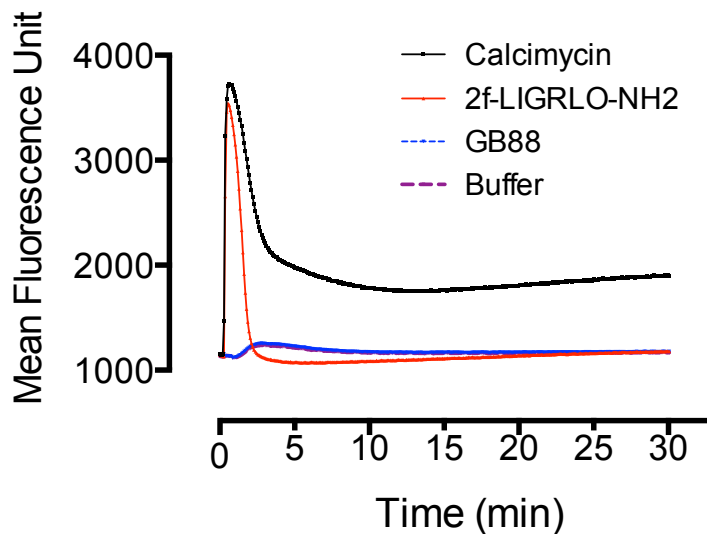

Figure S3. Intracellular calcium release by PAR<sub>2</sub> ligands in HT29 cells. Calcimycin was used a control. Cells were treated with 2f-LIGRLO-NH<sub>2</sub> (1  $\mu$ M, red) and GB88 (10  $\mu$ M, blue) and

fluorescence measured for 30 min after compound addition. 2f-LIGRLO-NH<sub>2</sub> showed similar maxima as calcimycin and GB88 showed no significant different from buffer (purple) alone.

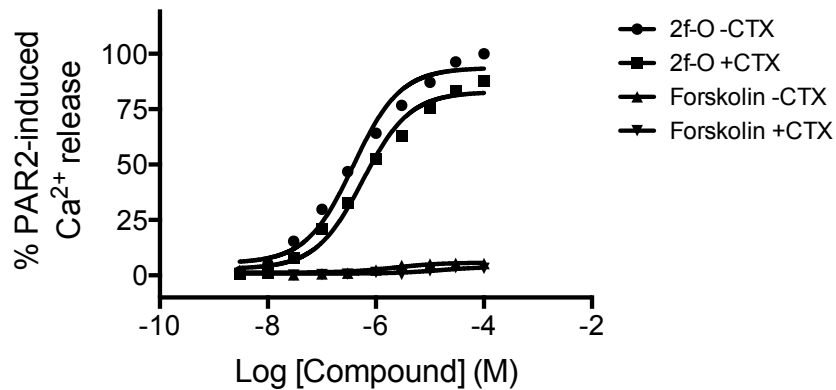

Figure S4. 2f-LIGRLO-NH<sub>2</sub> increased intracellular calcium release independent of Gs in HT29 cells. HT29 cells were treated with cholera toxin (200ng.mL<sup>-1</sup>, 24 h) and treated with 2f-LIGRLO-NH<sub>2</sub> or forskolin for calcium release. Forskolin failed to induce intracellular calcium release and CTX has no effect on PAR<sub>2</sub>-mediated Ca<sup>2+</sup> response.

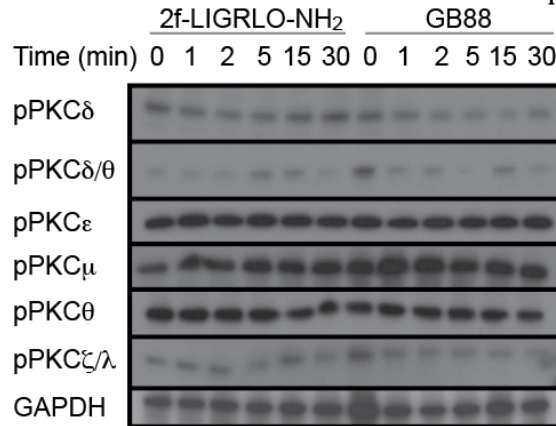

Figure S5. 2f-LIGRLO-NH<sub>2</sub> and GB88 failed to significantly increase phosphorylation of PKC subtypes in HT29 cells. Cells were treated with 2f-LIGRLO-NH<sub>2</sub> (1 μM) or GB88 (10 μM) for various durations and examined by western blot using phosphor-specific antibodies.

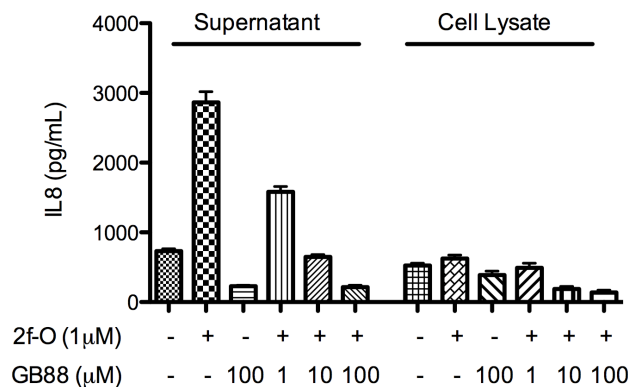

Figure S6. GB88 blocks IL-8 secretion in HT29 cells. Cells were treated with 2f-LIGRLO-NH<sub>2</sub> (1 μM, 24 h) with various concentration of GB88. Supernatants or cell lysates were collected and analyzed by ELISA. GB88 was able to block 2f-LIGRLO-NH<sub>2</sub>-induced IL-8 secretion and no significant changes in level of IL-8 in cells.

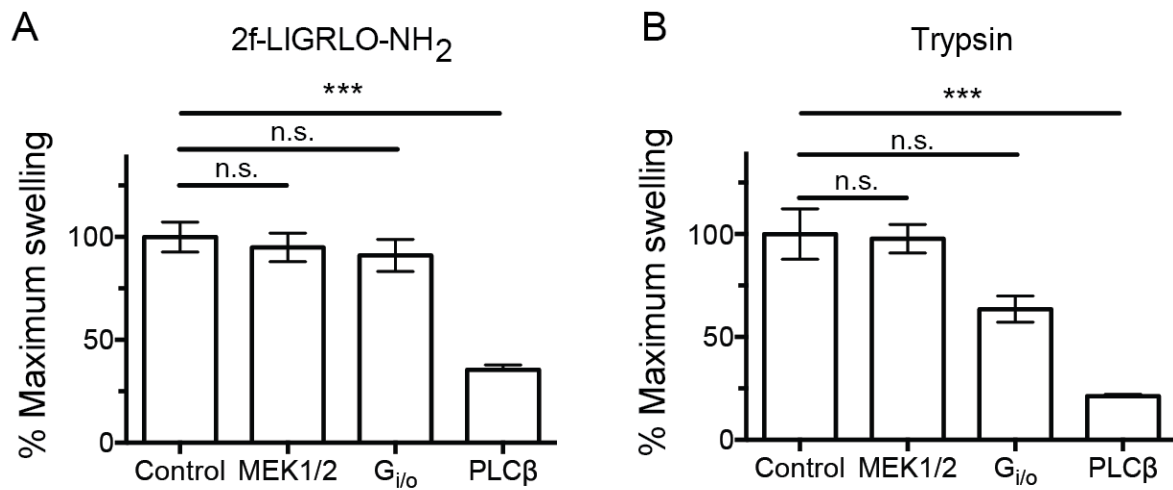

Figure S7. Effects of inhibitors on PAR2-induced paw oedema in rat. PLCb (100  $\mu$ M, 30 min) significantly inhibited Wistar rat paw oedema induced by intraplana injection of PAR2 agonist 2f-LIGRLO-NH<sub>2</sub> (A, 350  $\mu$ g) or trypsin (B, 20  $\mu$ g). Other inhibitors (MEK1/2 (U0126, 10  $\mu$ M) or Gi/o (PTX, 5  $\mu$ g) failed to cause any significant changes. N = 3, \*\*\* p<0.001.
